# Supplementary material
Source: PubMed Central journal article supplement (PMC2703523)

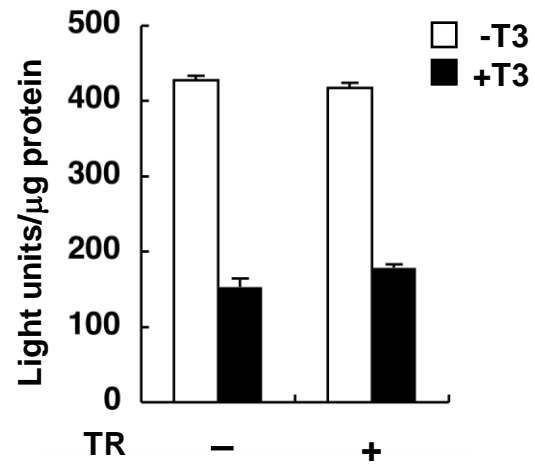

**Supplementary figure 1**

Supplement: en.2008-1738_2.pdf [file en.2008-1738_2.pdf]

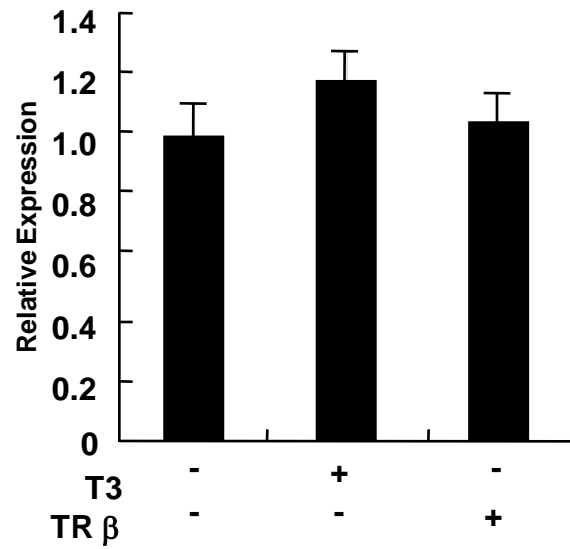

**Supplementary figure 2**

Supplement: en.2008-1738_3.pdf [file en.2008-1738_3.pdf]

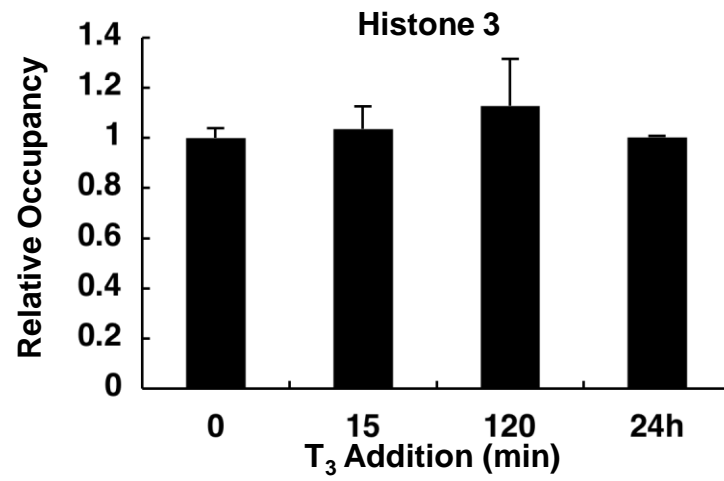

**Supplementary figure 3**

Supplement: en.2008-1738_4.pdf [file en.2008-1738_4.pdf]

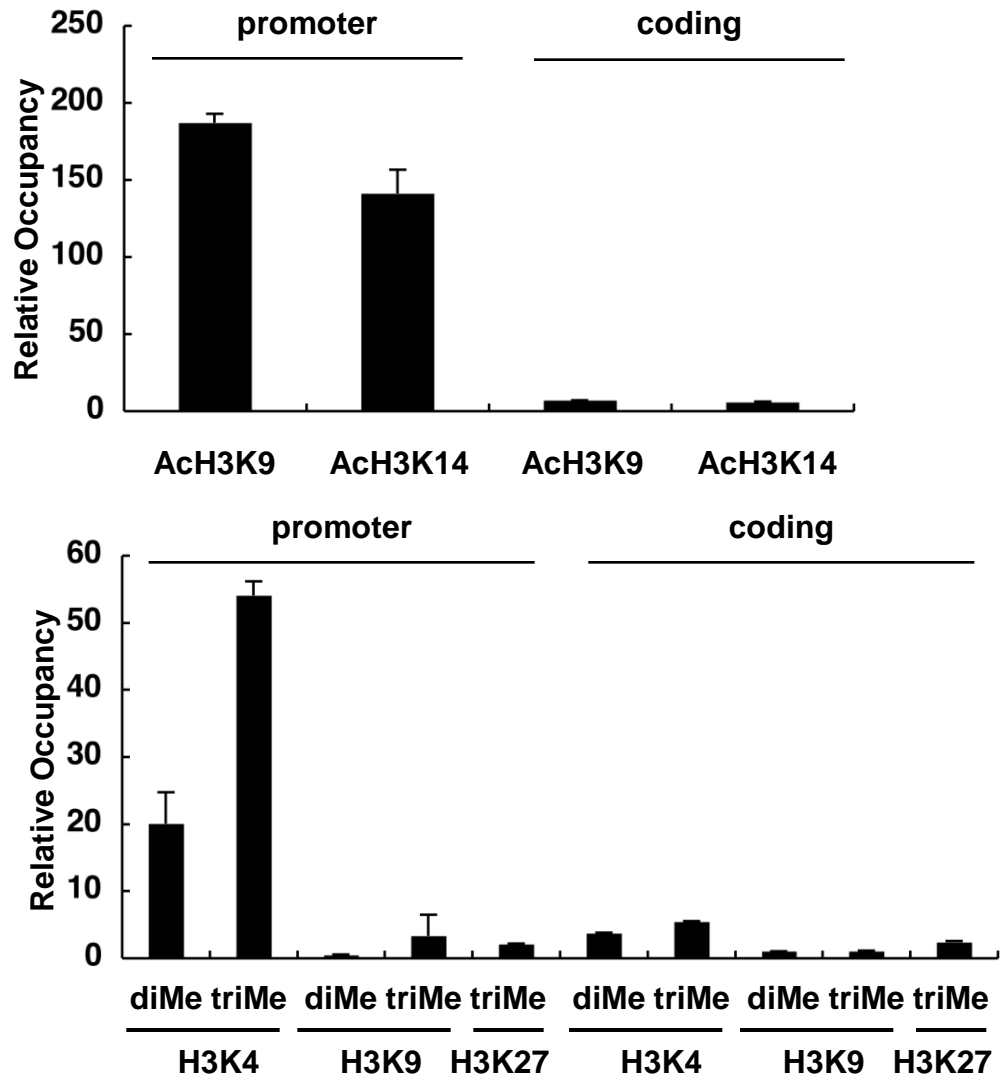

Supplementary figure 4

Supplement: en.2008-1738_5.pdf [file en.2008-1738_5.pdf]

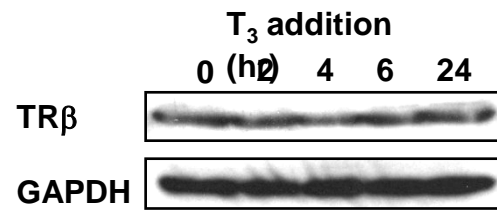

**Supplementary figure 5**

Supplement: en.2008-1738_6.pdf [file en.2008-1738_6.pdf]

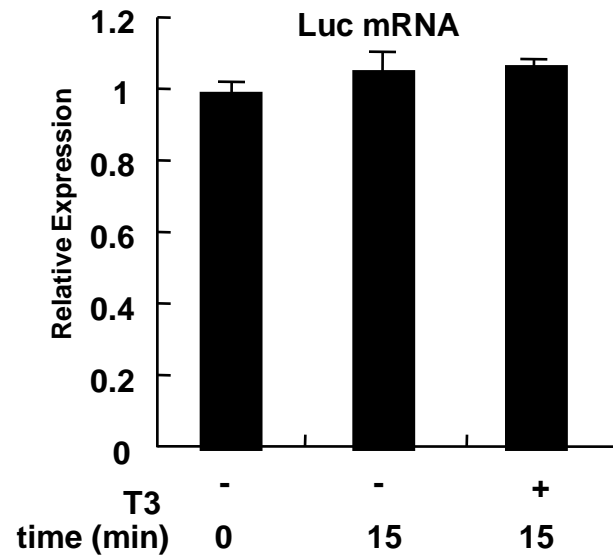

**Supplementary figure 6**

Supplement: en.2008-1738_7.pdf [file en.2008-1738_7.pdf]
